# Supplementary material
Source: PubMed Central journal article supplement (PMC5555179)
Supplement: 10.1074_M117.794586_jbc.M117.794586-1.pdf [file 10.1074_M117.794586_jbc.M117.794586-1.pdf]

Verissimo *et al.*, Supplemental Table S1. nLC-MS/MS data used for identification of the protein bands seen in Fig. 5

| Band MW      | Peptide sequence                 | # Spectral matches | X <sub>corr</sub> | Protein                       |                               |
|--------------|----------------------------------|--------------------|-------------------|-------------------------------|-------------------------------|
| 13.5 kDa     | HM*VQPDEVLSDPGLEAR               | 11                 | 4.17              | CcmH<br>( $\Sigma$ Cov 68.87) |                               |
|              | FGEYVLFEPERR                     | 9                  | 3.48              |                               |                               |
|              | SPVC*QGENIDESNAGVSR              | 6                  | 4.98              |                               |                               |
|              | LVAGDSDAQVIDYIK                  | 6                  | 3.97              |                               |                               |
|              | QISQVLRSPVC*QGENIDESNAGVSR       | 5                  | 2.51              |                               |                               |
|              | LVAGDSDAQVIDYIKDR                | 2                  | 3.86              |                               |                               |
|              | ERLVAGDSDAQVIDYIKDR              | 1                  | 3.37              |                               |                               |
| 17.5 kDa     | M*GLDWGVAGVPETFVVDGAGR           | 19                 | 5.06              | CcmG<br>( $\Sigma$ Cov 68.07) |                               |
|              | VEHPNLIGLK                       | 12                 | 3.41              |                               |                               |
|              | DTPDQAQGFLAEM*GSPYTR             | 12                 | 4.54              |                               |                               |
|              | LEPLGAEAPFTDADLR                 | 12                 | 3.59              |                               |                               |
|              | KIDPLLAGTADR                     | 8                  | 3.42              |                               |                               |
|              | IAGPLTEDVITK                     | 7                  | 3.78              |                               |                               |
|              | LGADPGNKM*GLDWGVAGVPETFVVDGAGR   | 7                  | 3.95              |                               |                               |
|              | IAGPLTEDVITKK                    | 5                  | 2.74              |                               |                               |
|              | LEPLGAEAPFTDADLRDGG              | 3                  | 3.21              |                               |                               |
|              | IDPLLAGTADR                      | 3                  | 3.27              |                               |                               |
|              | QDGIEM*GVNWKDTPDQAQGFLAEM*GSPYTR | 2                  | 4.95              |                               |                               |
|              | DTPDQAQGFLAEMGSPYTR              | 2                  | 3.92              |                               |                               |
|              | QDGIEMGVNWKDTPDQAQGFLAEM*GSPYTR  | 1                  | 3.38              |                               |                               |
|              | MGLDWGVAGVPETFVVDGAGR            | 1                  | 2.65              |                               |                               |
| 33 kDa       | VEHPNLIGLK                       | 12                 | 3.56              | CcmG<br>( $\Sigma$ Cov 68.07) |                               |
|              | KIDPLLAGTADR                     | 6                  | 3.18              |                               |                               |
|              | DTPDQAQGFLAEM*GSPYTR             | 6                  | 4.53              |                               |                               |
|              | QDGIEM*GVNWK                     | 6                  | 3.69              |                               |                               |
|              | LEPLGAEAPFTDADLR                 | 6                  | 3.62              |                               |                               |
|              | M*GLDWGVAGVPETFVVDGAGR           | 5                  | 2.62              |                               |                               |
|              | IAGPLTEDVITKK                    | 4                  | 3.09              |                               |                               |
|              | IAGPLTEDVITK                     | 3                  | 3.36              |                               |                               |
|              | LEPLGAEAPFTDADLRDGG              | 3                  | 2.59              |                               |                               |
|              | LGADPGNKM*GLDWGVAGVPETFVVDGAGR   | 3                  | 5.45              |                               |                               |
|              | SPVC*QGENIDESNAGVSR              | 6                  | 5.21              |                               | CcmH<br>( $\Sigma$ Cov 60.38) |
|              | HM*VQPDEVLSDPGLEAR               | 5                  | 4.09              |                               |                               |
|              | LVAGDSDAQVIDYIK                  | 4                  | 3.37              |                               |                               |
|              | LVAGDSDAQVIDYIKDR                | 1                  | 2.69              |                               |                               |
| FGEYVLFEPERR | 1                                | 3.42               |                   |                               |                               |

\*indicates oxidized methionine or carbamidomethylated cysteine; highlighted peptides are indicated on Fig. 5, and all MS/MS spectra are available upon request.

Verissimo *et al*, Supplemental Figure S1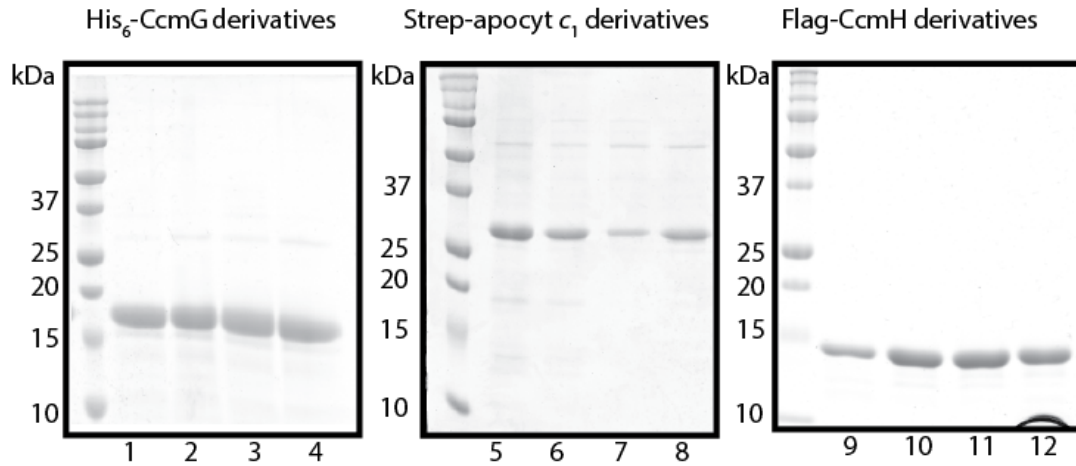

**Figure S1. Purified mutant derivatives of His<sub>6</sub>-CcmG, Flag-CcmH and Strep-apocyt c<sub>1</sub>.**  
**Left panel:** Coomassie Blue stained SDS-PAGE of ~ 3 μg of Ni Sepharose HP purified His<sub>6</sub>-CcmG<sup>wt</sup> (lane 1), His<sub>6</sub>-CcmG<sup>C75</sup> (lane 2), His<sub>6</sub>-CcmG<sup>C78</sup> (lane 3) and His<sub>6</sub>-CcmG\* (lane 4).  
**Middle panel:** Coomassie Blue stained SDS-PAGE of ~ 8 μg of Strep-Tactin Sepharose purified Strep-apocyt c<sub>1</sub><sup>wt</sup> (lane 5), Strep-apocyt c<sub>1</sub><sup>C34</sup> (lane 6), Strep-apocyt c<sub>1</sub><sup>C37</sup> (lane 7) and Strep-apocyt c<sub>1</sub>\* (lane 8).  
**Right panel:** Coomassie Blue stained SDS-PAGE of ~ 3 μg of Anti-Flag (DYKDDDDK peptide) affinity gel purified Flag-CcmH<sup>wt</sup> (lane 9), Flag-CcmH<sup>C42</sup> (lane 10), Flag-CcmH<sup>C45</sup> (lane 11) and Flag-CcmH\* (lane 12).

Verissimo *et al*, Supplemental Figure S2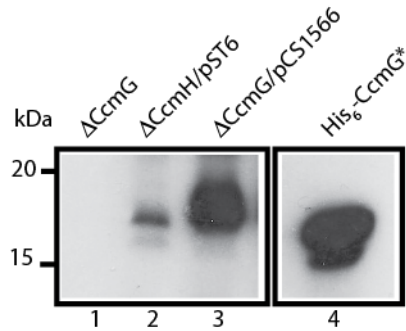

**Figure S2. Immunoblot analysis of *R. capsulatus* strains and purified CcmG protein for the validation of the specificity of CcmG polyclonal antibodies.** Immunoblot analysis of cell extracts from *R. capsulatus* mutants MD11 lacking CcmG ( $\Delta\text{CcmG}$ , lane 1), MD14/pST6 lacking CcmH and complemented with the plasmid pST6 carrying wild-type CcmH ( $\Delta\text{CcmH/pST6}$ , lane 2) and MD11/pCS1566 lacking CcmG and complemented with plasmid pCS1566 carrying wild-type CcmG ( $\Delta\text{CcmG/pCS1566}$ , lane 3) (**Table 1**) were used together with  $\sim 5$  ng of purified  $\text{His}_6\text{-CcmG}^*$  (a CcmG variant lacking its catalytic Cys residues) to validate that the newly raised rabbit anti-CcmG polyclonal antibodies are specific of CcmG. Note that no signal is recognized with extracts from a mutant lacking CcmG.
